# Supplementary material for: A sensitive and rapid radiolabelling method for thein vivopharmacokinetic study of lentinan
Source: Royal Society of Chemistry journal article supplement (doi:10.1039/c8fo00272j), 2018-01-01

**Method:** We purified  $^{99m}\text{Tc}$ -DTPA-LNT on a PD-10 column and collected the effluent in 0.5 mL volumes per tube. The radioactivity of each tube was calculated, and the corresponding sugar content (representing the LNT concentration) was measured.

**Results:** The curve of  $\gamma$  intensity from the PD-10 column was basically consistent with the curve of LNT concentration.

**Figure S1:** The curve of  $\gamma$  intensity and LNT concentration from the PD-10 column.

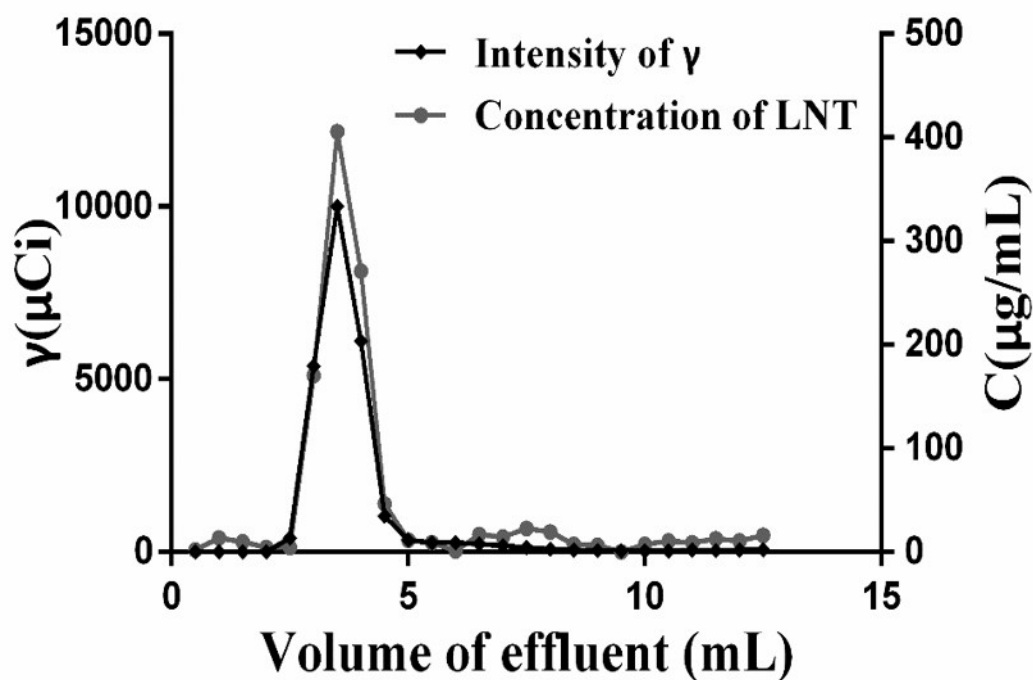

Supplement: c8fo00272j1.pdf [file c8fo00272j1.pdf]
