# Supplementary material for: A sensitive and rapid radiolabelling method for thein vivopharmacokinetic study of lentinan
Source: Royal Society of Chemistry journal article supplement (doi:10.1039/c8fo00272j), 2018-01-01
Supplement: c8fo00272j2.pdf [file c8fo00272j2.pdf]

**Method:** Eighteen rats randomly divided into three groups (n=6), were euthanized at 8 h following intravenous LNT administration (equivalent to 0.5 mg/kg, 2 mg/kg and 8 mg/kg). Tissues and organs of interest were collected and dried on filter paper. Following accurate weighing, the tissue radioactivity was determined with the gamma counter. Blank tissue samples from rats were collected and measured as the background. Finally, the radioactive distribution was expressed as the percentage of the injected dose per gram of tissue (%ID/g).

**Results:** The results showed that, LNT was also concentrated in the liver and spleen of rats, and there was no significant difference in tissue uptake of LNT among the three doses administered.

**Table S1:** *In vivo* tissue distribution studies of  $^{99m}\text{Tc}$ -DTPA-LNT in rats at 8 h (as % per gram of injected dose $\pm$ SD)

|               | 0.5 mg/kg        | 2 mg/kg          | 8 mg/kg          |
|---------------|------------------|------------------|------------------|
| Heart         | 0.04 $\pm$ 0.01  | 0.04 $\pm$ 0.01  | 0.05 $\pm$ 0.00  |
| Liver         | 8.29 $\pm$ 0.81  | 8.29 $\pm$ 0.93  | 8.14 $\pm$ 1.13  |
| Spleen        | 12.55 $\pm$ 1.16 | 11.78 $\pm$ 1.33 | 12.71 $\pm$ 0.92 |
| Kidney        | 1.42 $\pm$ 0.35  | 1.18 $\pm$ 0.27  | 1.28 $\pm$ 0.24  |
| Lung          | 0.44 $\pm$ 0.02  | 0.47 $\pm$ 0.06  | 0.48 $\pm$ 0.06  |
| Stomach       | 0.73 $\pm$ 0.12  | 0.73 $\pm$ 0.16  | 0.71 $\pm$ 0.14  |
| S-intestines  | 0.12 $\pm$ 0.04  | 0.11 $\pm$ 0.03  | 0.12 $\pm$ 0.04  |
| L- intestines | 0.07 $\pm$ 0.02  | 0.07 $\pm$ 0.01  | 0.07 $\pm$ 0.02  |
